# Supplementary material for: Modulating MoS2 Conductivity through Nitrogen Doping: A Spray-Coating Approach to P-Type 2D Semiconductors
Source: Research Square preprint supplement (doi:10.21203/rs.3.rs-7675417/v1), 2025-11-03
Supplement: Supplementary file 1 [file b99f95a8a157aba47aa82d35.docx]

**Supplementary Information**

**Modulating MoS2 Conductivity through Nitrogen Doping: A Spray-Coating Approach to P-Type 2D Semiconductors**

Thomas Vicart1,2, Youssef Doubi1, Bouchra Asbani1, Nitul Rajput3, Ahmed Kotbi1, Mimoun El Marssi1, My Ali EL Khakani2, Mustapha Jouiad1,*

*1Laboratory of Physics of Condensed Matter, University of Picardie Jules Verne, Scientific Pole, 33 rue Saint-Leu, 80039 Amiens Cedex 1, France, France*

*2Institut National de la Recherche Scientifique, Centre-Energie, Matériaux et Télécommunications, 1650, Blvd, Lionel–Boulet, Varennes, QC J3X-1P7, Canada*

*3Advanced Materials Research Center, Technology Innovation Institute, P.O. Box 9639, Abu Dhabi, UAE*

*Corresponding author: mustapha.jouiad@u-picardie.fr*


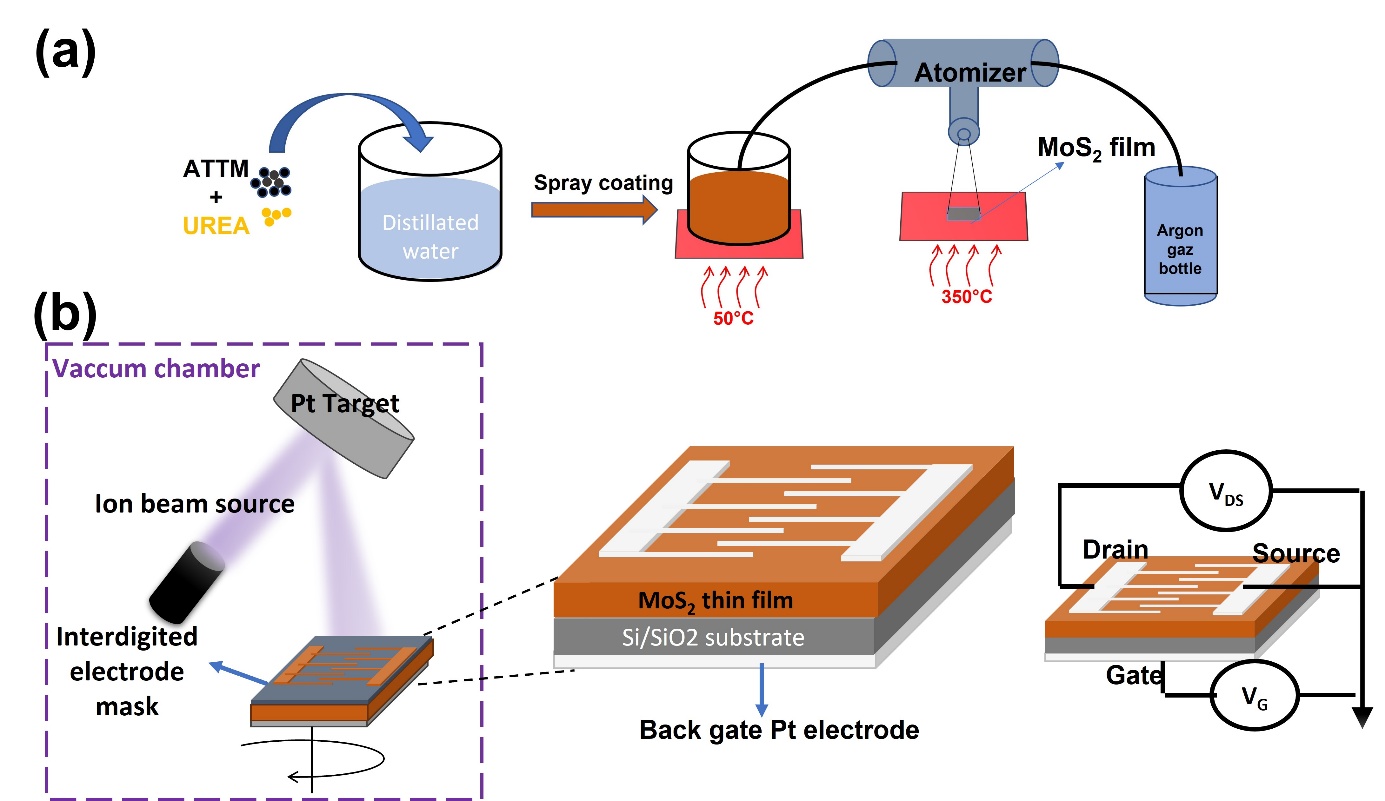


**Figure S1.** Experimental process for MoS2 based device fabrication. (a) Schematic representation of the spray coating system used for the synthesis of MoS₂. (b) Device fabrication setup involving ions beam deposition (PECS II – Model 685) of Pt electrodes, followed by the assembly of the MoS2 based Field Effect Transistor (FET).


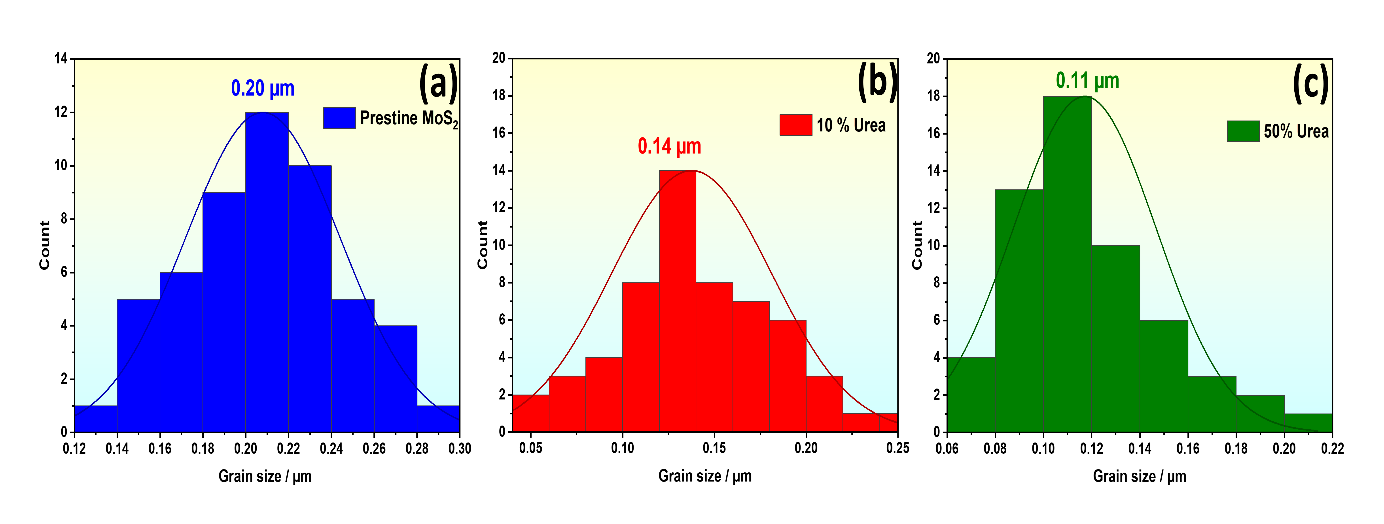


**Figure S2** Distribution of grain size in MoS2 thin films: a) Pristine MoS2; b) 10% nitrogen-doped MoS2; c) 50% nitrogen-doped MoS2.

**Figure S3** XRD diagram for pristine, 10% and 50% nitrogen doped MoS2 thin films including a zoom in on (100) peak to showcase the XRD shift-induced nitrogen doping.


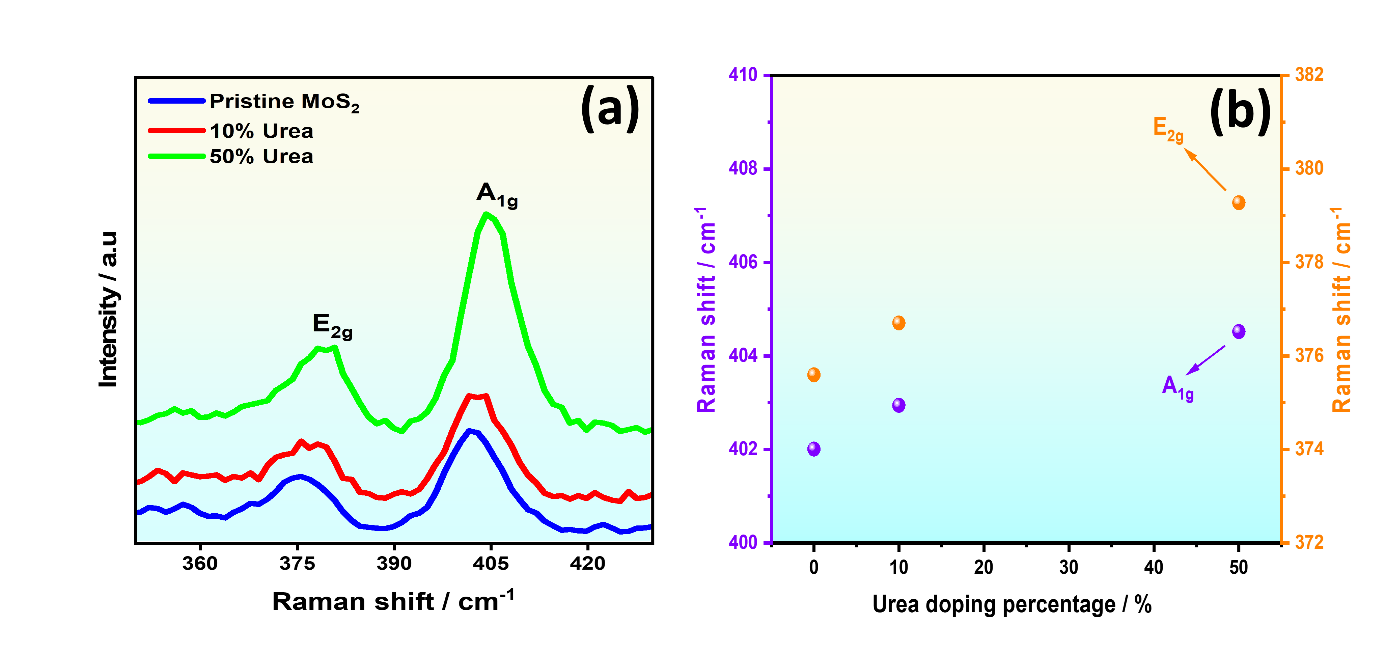


**Figure S4.** Raman spectroscopy analysis of MoS₂ thin films. (a) Zoomed Raman spectra showing the characteristic A₁g and E12g modes, highlighting shifts in peak positions indicative of structural and phase modifications induced by N-doping. (b) Variation of the A1g and E2g Raman peak positions as a function of urea doping concentration.


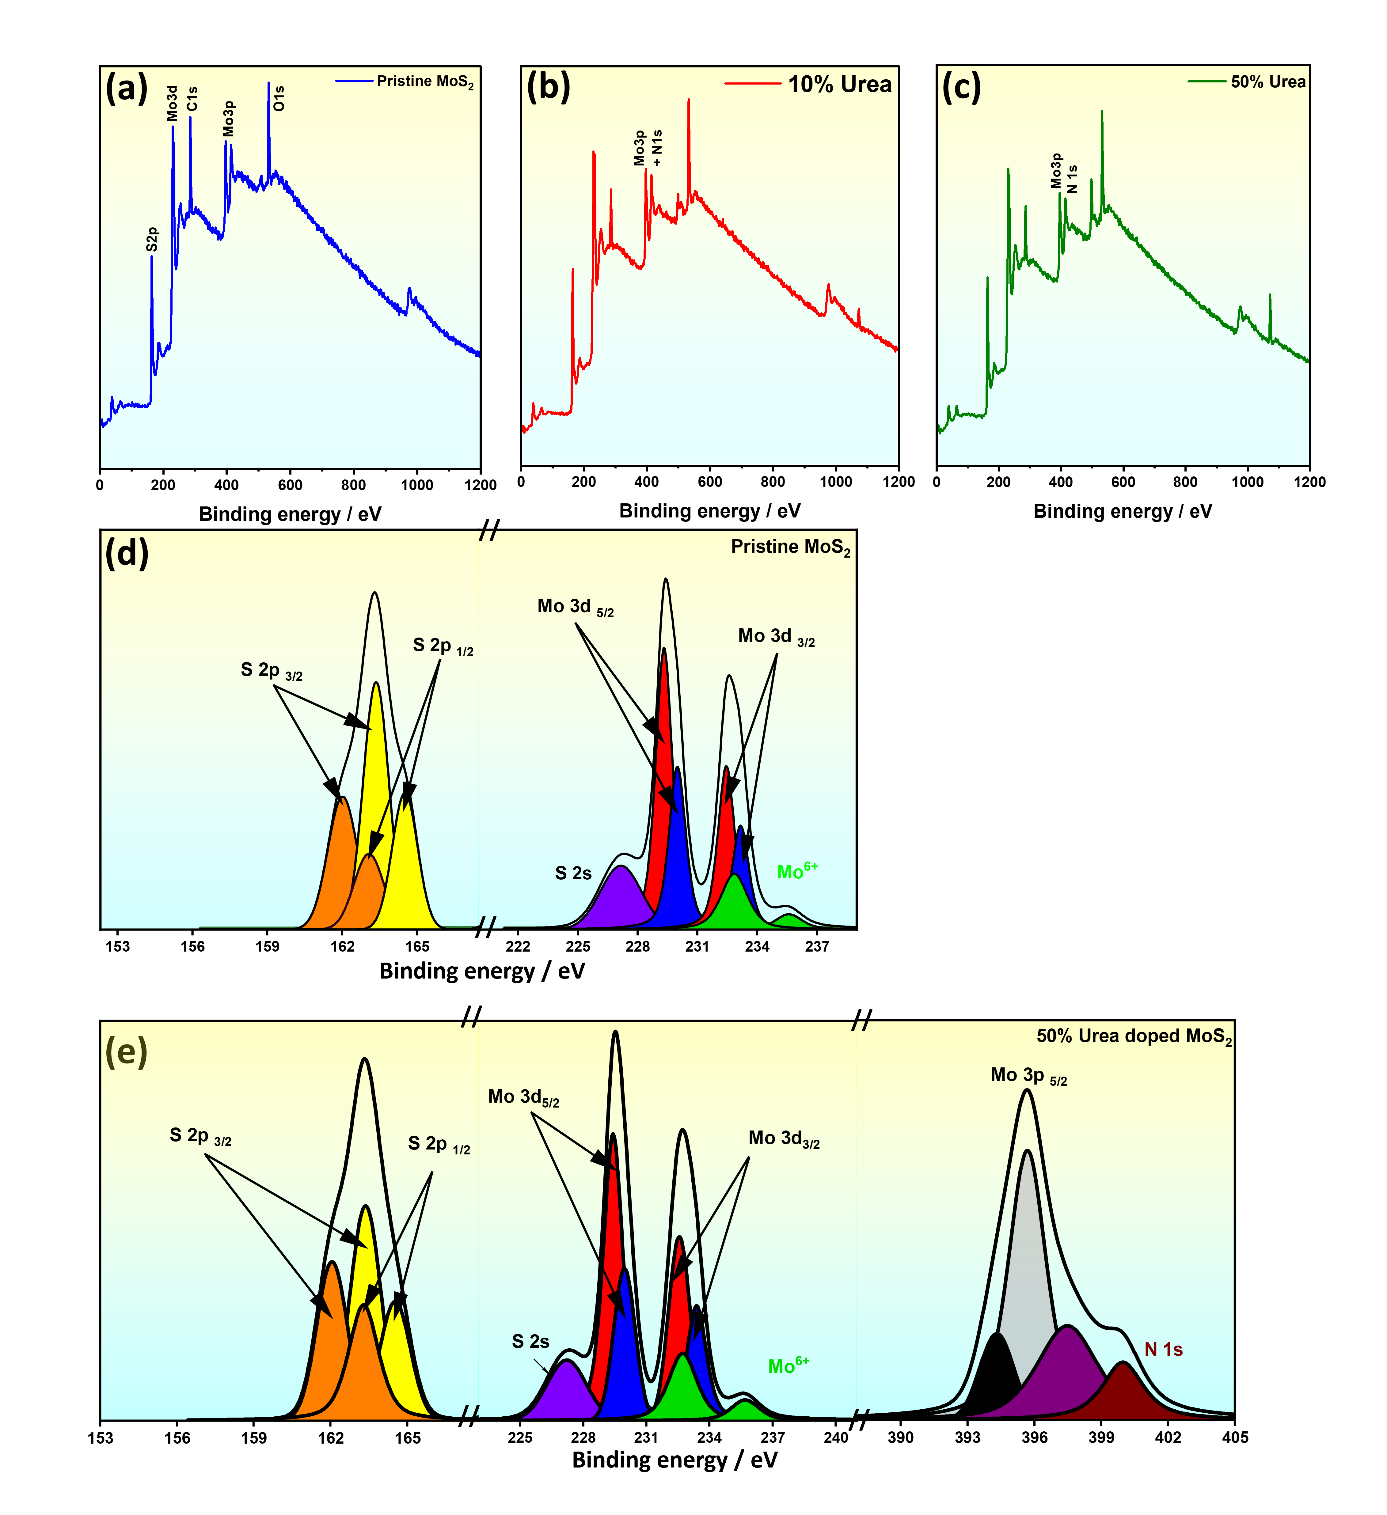


**Figure S5.** XPS elemental and compositional analysis of MoS2 thin films. (a–c) General XPS survey spectra of (a) pristine MoS2. (b) 10% urea-doped MoS2. (c) 50% urea-doped MoS2. High-resolution XPS spectrum of (d) pristine MoS2. (e) 50% urea-doped MoS2.


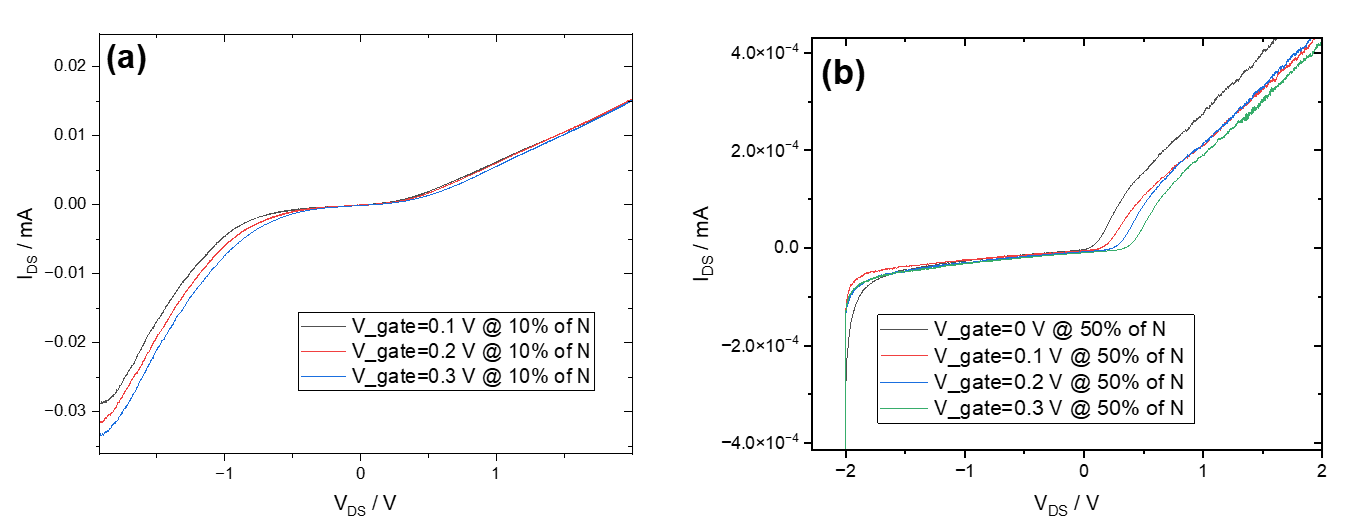


**Figure S6.** IDS-VDS plots with respect to various gate bias for sample: a) 10% N-doping; b) 50% N-doping

**Table S1.** XPS element contents Mo, S and N in MoS2 thin films.

| Samples | Mo / at% | S / at% | N / at% |
| --- | --- | --- | --- |
| Pristine MoS2 | 28.79 | 71.21 | - |
| 10% Urea doped MoS2 | 42.75 | 54.46 | 2.79 |
| 50% Urea doped MoS2 | 42.36 | 52.81 | 4.83 |
